# Supplementary material
Source: PubMed Central journal article supplement (PMC3091229)
Supplement: supp_M110.214585_jbc.M110.214585-1.pdf [file supp_M110.214585_jbc.M110.214585-1.pdf]

### Supplemental Fig. S1

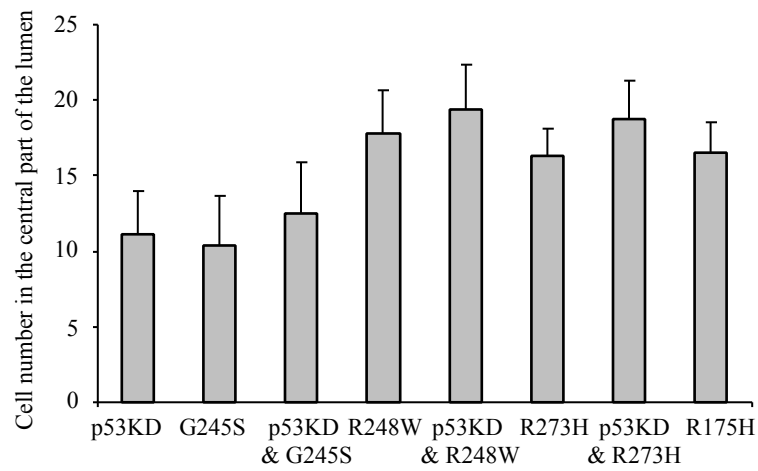

**Figure S1. The number of cells in the center of the lumen from MCF10A cells in which a p53 mutant was ectopically expressed along with or without knockdown of endogenous wild-type p53. The number of cells in the central part of spherical structures from serial confocal cross-sections was counted.**
